# Supplementary material
Source: MDPI journal article supplement (https://www.mdpi.com/2073-8994/11/3/400)
Supplement: s1 [file s1]

## Supplementary Materials

**Table S1.** Summary of Study Characteristics–Pain Management Mobile Applications aspects of design concerns.

| Author & Year                                                                                                       | Pain Type                                         | Targeted Population (Age, Gender, Technology Literacy level of the study participants) | Outcome measures                                                                                                                                                                    | Technology (Device, Platform & Technique)                                                                             | Data Input mode | Frequency of Data Input                                | Data input Method                                                  | Types of Assessment |
|---------------------------------------------------------------------------------------------------------------------|---------------------------------------------------|----------------------------------------------------------------------------------------|-------------------------------------------------------------------------------------------------------------------------------------------------------------------------------------|-----------------------------------------------------------------------------------------------------------------------|-----------------|--------------------------------------------------------|--------------------------------------------------------------------|---------------------|
| Serif, T., & Ghinea, G. (2005) [38]                                                                                 | chronic back pain                                 | 27–65 years, both male and female, literacy level not mentioned                        | pain type, location and intensity                                                                                                                                                   | PDA; Windows CE; Internet Technology & Mobile Computing                                                               | active          | every 2 hours between 10am to 4pm<br>4 times a day     | 1. Pain drawing<br>2. Visual analogue scale<br>3. Open Answers     | static & standard   |
| Stinson, J. N., Petroz, G. C., Tait, G., Feldman, B. M., Streiner, D., McGrath, P. J., & Stevens, B. J. (2006) [44] | chronic pain of juvenile idiopathic arthritis     | 9-18 years, both male and female, 90% aware with technology                            | pain intensity<br>stiffness and fatigue                                                                                                                                             | PDA, palm operating system; Internet Technology & Mobile Computing                                                    | active          | three times a day                                      | 1. VAS Slider<br>2. Pain drawing                                   | dynamic & standard  |
| Kearney, N., Kidd, L., Miller, M., Sage, M., Khorrami, J., McGee, M., ... & Gray, P. (2006) [58]                    | cancer pain                                       | 24–77 years, both male and female, literacy level not mentioned                        | pain and associated symptoms fatigue, nausea and vomiting, oral problems, diarrhea and breathlessness depending on diagnosis                                                        | handheld computer; web based and flexible to use on hand held PCs; Internet Technology & Mobile Computing             | active          | not mentioned                                          | Multiple choice questions                                          | static & standard   |
| Sorbi, M. J., Mak, S. B., Houtveen, J. H., Kleiboer, A. M., & van Doornen, L. J. (2007) [40]                        | chronic migraine                                  | 34-52 years, female, literate, working professionals and have knowledge of technology  | (1) migraine headache and medication use, (2) attack precursors, and (3) self-relaxation and other preventive behavior; in addition, menstruation and disturbed sleep is monitored. | PDA; palm operating system; Internet Technology & Mobile Computing                                                    | active          | 1st run 4-5 times a day<br><br>2nd run 2-3 times a day | 1. Multiple Choice<br>2. Visual Analogue Scales<br>3. Open answers | static & standard   |
| Anatchkova, M. D., Saris-Baglama, R. N., Kosinski, M., & Bjorner, J. B. (2009) [23]                                 | Chronic Pain                                      | >=18 years, both male and female, literacy level not mentioned                         | pain severity                                                                                                                                                                       | tablet PC; Microsoft XP Tablet Edition operating system; Internet Technology & Mobile Computing & Advanced Algorithms | active          | not mentioned                                          | Visual rating scales                                               | dynamic & standard  |
| McClellan, C. B., Schatz, J. C., Puffer, E., Sanchez, C. E., Stancil, M. T., & Roberts, C. W. (2009) [34]           | chronic vaso-occlusive pain (sickle cell disease) | 8–20 years, both male and female, literacy level not mentioned                         | daily pain report                                                                                                                                                                   | Motorola Q Smartphone; windows mobile; Internet Technology & Mobile Computing                                         | active          | average 2 times a day                                  | 1. numerical rating scale<br>2. Multiple choice questions          | static & standard   |

|                                                                                                                |                                                         |                                                                                              |                                                                                       |                                                                                                                                                    |                                                                                                                                                                |                                                            |                                                                                                             |                     |
|----------------------------------------------------------------------------------------------------------------|---------------------------------------------------------|----------------------------------------------------------------------------------------------|---------------------------------------------------------------------------------------|----------------------------------------------------------------------------------------------------------------------------------------------------|----------------------------------------------------------------------------------------------------------------------------------------------------------------|------------------------------------------------------------|-------------------------------------------------------------------------------------------------------------|---------------------|
| Luckmann, R., & Vidal, A. (2010) [24]                                                                          | non cancer Chronic Pain                                 | Age not specified, gender not specified, literacy level not mentioned                        | routine pain, activity, medication and non-medication treatment                       | PDA (iPaq - pocket PC); windows mobile operating system; Internet Technology & Mobile Computing                                                    | active                                                                                                                                                         | enter data every 2–4 h                                     | Multiple choice question<br><br>(questions to answer with suitable option from a response set)              | static & customized |
| Hachizuka, M., Yoshiuchi, K., Yamamoto, Y., Iwase, S., Nakagawa, K., Kawagoe, K., & Akabayashi, A. (2010) [26] | cancer pain                                             | >=20 years, both male and female, none had previously used PDA or computer                   | pain intensity                                                                        | PDA; palm operating system; Internet Technology & Mobile Computing                                                                                 | active                                                                                                                                                         | average 3 times a day additional on taking rescue medicine | visual analogue scale                                                                                       | static & standard   |
| Rosser, B. A., McCullagh, P., Davies, R., Mountain, G. A., McCracken, L., & Eccleston, C. (2011) [15]          | chronic pain                                            | Age not specified, both male and female, familiar with computing and mobile technology       | pain intensity mood other experimental variables                                      | Mobile device - HTC smartphone HomeHub (static touch screen computer) - eeeTop Asus; Windows mobile 6.5 OS; Internet Technology & Mobile Computing | hybrid smartphone app and an inbuilt accelerometer and Global positioning System (GPS) technology to cooperatively monitor the individual's physical activity. | not mentioned                                              | Numeric rating scale                                                                                        | static & customized |
| Jacob, E., Stinson, J., Duran, J., Gupta, A., Gerla, M., Lewis, M. A., & Zeltzer, L. (2012) [35]               | chronic pain in sickle cell disease                     | 10-17 years, both male and female, literacy level not mentioned                              | pain and associated symptoms tiredness, headache, coughing, fatigue                   | Smartphone; platform not mentioned; Internet Technology & Mobile Computing & Web Technology                                                        | active                                                                                                                                                         | pain experience in last 12 hours                           | 1. visual analogue scale<br>2. body outline diagram<br>3. multiple choice question<br>4. free text question | static & standard   |
| Spyridonis, F., Grønli, T. M., Hansen, J., & Ghinea, G. (2012) [46]                                            | body pain in wheelchair patients (musculoskeletal pain) | >=18 years, both male and female, literacy level not mentioned                               | pain type and location (not even intensity, only to record pain variation with time)  | smartphone and tablets; android; Internet Technology & Mobile Computing & Virtual Reality                                                          | active                                                                                                                                                         | not mentioned                                              | body outline diagram / pain drawing                                                                         | static & standard   |
| Baggott, C., Gibson, F., Coll, B., Kletter, R., Zeltzer, P., & Miaskowski, C. (2012) [27]                      | cancer pain                                             | 13-21 years, both male and female, participants had basic computer and mobile phone literacy | pain, nausea, vomiting, fatigue and sleep quality                                     | smartphone – iPhone; iOS; Internet Technology & Mobile Computing                                                                                   | active                                                                                                                                                         | single daily report to avoid patient burden                | 1. body diagram<br>2. color analog scale (visual analog scale)<br>3. Face pain scale                        | static & standard   |
| Stinson, J. N., Jibb, L. A., Nguyen, C., Nathan, P. C., Maloney, A. M.,                                        | cancer pain                                             | 9-18 years, both male and female, literacy level not mentioned                               | sensory, effective and evaluative nature of pain as well as questions related to pain | smartphone – iPhone; Apple iOS - client side Ibatis.NET - server side                                                                              | active                                                                                                                                                         | twice a day                                                | 1. visual analogue slider (dimensions of pain)                                                              | static & standard   |

|                                                                                                                            |                                                    |                                                                                                                  |                                                                                                                                                           |                                                                                                                                                      |        |                   |                                                                                                                                                                                      |                                                                                                                                                                                                                            |  |
|----------------------------------------------------------------------------------------------------------------------------|----------------------------------------------------|------------------------------------------------------------------------------------------------------------------|-----------------------------------------------------------------------------------------------------------------------------------------------------------|------------------------------------------------------------------------------------------------------------------------------------------------------|--------|-------------------|--------------------------------------------------------------------------------------------------------------------------------------------------------------------------------------|----------------------------------------------------------------------------------------------------------------------------------------------------------------------------------------------------------------------------|--|
| Dupuis, L. L., ... & Portwine, C. (2013) [28]                                                                              |                                                    |                                                                                                                  | management strategies and their effectiveness                                                                                                             | MS SQL Server 2008 – Database; Internet Technology, Mobile Computing, Computer Graphics (Gamification)                                               |        |                   |                                                                                                                                                                                      | 2. pain drawing (location)<br>3. MCQs (duration of pain, causes of pain, pain management strategies used and their effectiveness.)<br>4. List of options to select from<br>5. free-text question as additional information |  |
| Nes, A. A., Eide, H., Kristjánsdóttir, Ó. B., & van Dulmen, S. (2013) [42]                                                 | chronic widespread musculoskeletal pain            | Age not specified, female, literacy level not mentioned                                                          | Pain Catastrophizing pain intensity and fatigue                                                                                                           | PDA / Smartphone; Web based and flexible to use on PDA and smart phones; Internet Technology & Mobile Computing & Web Technology                     | active | 3 times a day     | multiple choice question                                                                                                                                                             | static & standard                                                                                                                                                                                                          |  |
| Garcia-Palacios, A., Herrero, R., Belmonte, M. A., Castilla, D., Guixeres, J., Molinari, G., ... & Botella, C. (2014) [43] | chronic pain in fibromyalgia                       | 37-65 years, Female, low level of education and low familiarity with technology.                                 | pain intensity fatigue intensity mood                                                                                                                     | Smartphone; windows mobile 6.1; Internet Technology & Mobile Computing                                                                               | active | three times a day | 1. numerical rating scale (pain and fatigue)<br>2. faced based pictorial rating scale (mood)                                                                                         | static & standard                                                                                                                                                                                                          |  |
| Pombo, N., Araújo, P., Viana, J., & da Costa, M. D. (2014) [21]                                                            | acute post-operative pain after ambulatory surgery | 18–75 years, both male and female, participants had basic computer and mobile phone literacy                     | pain intensity                                                                                                                                            | Smartphone; Android SQLite database WS (developed in Windows Communication Foundation, WCF); Internet Technology & Mobile Computing & Web Technology | active | 5 times a day     | Numeric rating scale                                                                                                                                                                 | Dynamic & customized                                                                                                                                                                                                       |  |
| Jibb, L. A., Stevens, B. J., Nathan, P. C., Seto, E., Cafazzo, J. A., & Stinson, J. N. (2014) [29]                         | pediatric cancer pain                              | 12-18 years, both male and female, 90% participants had own smartphones and comfortable in using this technology | pain intensity at the time of recording, pain intensity before 12 hours, pain interference with daily activities and sense not being able to control pain | Smartphone; Apple iOS; Internet Technology & Mobile Computing                                                                                        | active | not mentioned     | 1. visual analogue slider (dimensions of pain)<br>2. pain drawing (location)<br>3. MCQs (duration of pain, causes of pain, pain management strategies used and their effectiveness.) | static & standard                                                                                                                                                                                                          |  |

|                                                                                                                      |                                            |                                                                            |                                                                                                                                                    |                                                                                                   |        |                                                            |                                                                                  |                                                                                                                                                      |
|----------------------------------------------------------------------------------------------------------------------|--------------------------------------------|----------------------------------------------------------------------------|----------------------------------------------------------------------------------------------------------------------------------------------------|---------------------------------------------------------------------------------------------------|--------|------------------------------------------------------------|----------------------------------------------------------------------------------|------------------------------------------------------------------------------------------------------------------------------------------------------|
|                                                                                                                      |                                            |                                                                            |                                                                                                                                                    |                                                                                                   |        |                                                            |                                                                                  | 4. List of options to select from<br>5. free-text question as additional information                                                                 |
| Blödt, S., Pach, D., Roll, S., & Witt, C. M. (2014) [39]                                                             | Chronic Low Back Pain<br>Chronic Neck Pain | 18 to 65 years, gender not specified, participants had smartphone literacy | pain intensity<br>pain acceptance, stress, sick leaves, pain medication intake, adherence, suspected adverse reaction, and serious adverse events  | Smartphone; iOS and Android both; Internet Technology & Mobile Computing                          | active | once a day                                                 | multiple choice question                                                         | static & standard                                                                                                                                    |
| Maguire, R., Ream, E., Richardson, A., Connaghan, J., Johnston, B., Kotronoulas, G., ... & Webster, L. (2015) [30]   | Lung Cancer Pain                           | >=18 years, both male and female, less familiarity with use of technology  | pain, fatigue, nausea, depression, anxiety, drowsiness, shortness of breath, lack of appetite, sleep disorders, and impaired feeling of well-being | Smartphone; not mentioned; Internet Technology & Mobile Computing                                 | active | one time a day                                             | Multiple choice questions                                                        | static & standard                                                                                                                                    |
| Jonassaint, C. R., Shah, N., Jonassaint, J., & De Castro, L. (2015) [57]                                             | sickle cell                                | 16–54 years, both male and female, technology literacy                     | clinical symptoms, pain intensity, location and perceived severity, and treatment strategies                                                       | smartphone – iPhone, iPod Touch, tablet – iPad; Apple IOS; Internet Technology & Mobile Computing | active | 2 times a day or when required                             | VAS - horizontal multiple selection list                                         | Static & partially customized (pharmacological intervention specific to patient's clinical pain regimen) customization on other app features as well |
| Huguet, A., McGrath, P. J., Wheaton, M., Mackinnon, S. P., Rozario, S., Tougas, M. E., ... & MacLean, C. (2015) [55] | headache                                   | 14-28 years, both male and female, literacy level not mentioned            | It tracks temporal, sensory, and affective aspects of headaches, and headaches' impact on daily life, potential triggers, and coping behaviors.    | smartphone – iPhone; Apple IOS; Internet Technology & Mobile Computing                            | active | once a day or as per required                              | VAS - horizontal drop down list check boxes, text input fields                   | Static & standard question (optional as well) customized response set                                                                                |
| Nguyen, A. M., Humphrey, L., Kitchen, H., Rehman, T., & Norquist, J. M.                                              | dysmenorrhea pelvic pain                   | 14–50 years, female, all educational levels and age group                  | menstrual bleeding severity, pelvic pain/cramps severity, use of analgesics, and impact on work/school,                                            | PDA; platform not mentioned; Internet Technology & Mobile Computing                               | active | Complete items each evening before bed (between 7 p.m. and | pain drawing (location) numerical rating scale (11 points) likert scale (yes/no) | static & standard                                                                                                                                    |

|                                                                                                                 |                                           |                                                                                  |                                                                                                                                                                                                                                                                 |                                                                                                                  |        |                                                                      |                                                                                                                            |                    |  |
|-----------------------------------------------------------------------------------------------------------------|-------------------------------------------|----------------------------------------------------------------------------------|-----------------------------------------------------------------------------------------------------------------------------------------------------------------------------------------------------------------------------------------------------------------|------------------------------------------------------------------------------------------------------------------|--------|----------------------------------------------------------------------|----------------------------------------------------------------------------------------------------------------------------|--------------------|--|
| (2015) [56]                                                                                                     |                                           |                                                                                  | physical activities, social and leisure activities, and sleep.                                                                                                                                                                                                  |                                                                                                                  |        |                                                                      | midnight) so they could focus on the entire day and previous night.                                                        |                    |  |
| Bakshi, N., Stinson, J. N., Ross, D., Lukombo, I., Mittal, N., Joshi, S. V., ... & Krishnamurti, L. (2015) [37] | Vaso-occlusive pain - sickle cell disease | Adolescents and Young Adults, both male and female, literacy level not mentioned | pain intensity (current, worst, and average), unpleasantness, pain descriptors, precipitating factors, pain interference with daily life including sleep, school, mobility, fatigue and enjoying life, and pain relieving treatments and response to treatments | Smartphone, computer, or tablet; platform not mentioned; Internet Technology & Mobile Computing & Web Technology | active | twice daily                                                          | pain drawing (location) numerical rating scale Check boxes                                                                 | Dynamic & standard |  |
| Hochstenbach, L. M., Zwakhalen, S. M., Courtens, A. M., van Kleef, M., & de Witte, L. P. (2016) [32]            | cancer pain                               | Age not specified, both male and female, literacy level not mentioned            | Patients registered their pain, adverse effects, interference of pain with activity or sleep, and satisfaction with pain treatment by use of a pain diary twice-daily. Medication intake                                                                        | iPad; Apple iOS; Internet Technology & Mobile Computing                                                          | active | twice daily                                                          | Numerical Rating Scale MCQs                                                                                                | static & standard  |  |
| Fortier, M. A., Chung, W. W., Martinez, A., Gago-Masague, S., & Sender, L. (2016) [31]                          | cancer pain                               | 8-18 years, both male and female, literacy level not mentioned                   | frequency, severity, distress                                                                                                                                                                                                                                   | tablet PC; Android; Internet Technology & Mobile Computing & Web Technology                                      | active | twice a day for 10 days                                              | Numerical Rating Scale Pain drawing / body map VAS - horizontal (Word graphic rating scale) Word List (to circle words)    | static & standard  |  |
| Ingadottir, B., Blondal, K., Thue, D., Zoega, S., Thylen, I., & Jaarsma, T. (2017) [22]                         | post-operative pain                       | ≥18 years, both male and female, technology literacy                             | pain intensity, pain medication intake                                                                                                                                                                                                                          | tablet PC; Android; Internet Technology, Mobile Computing, Computer Graphics (Gamification)                      | active | not mentioned                                                        | Numerical Rating Scale                                                                                                     | static & standard  |  |
| Jibb, L. A., Cafazzo, J. A., Nathan, P. C., Seto, E., Stevens, B. J., Nguyen, C., & Stinson, J. N. (2017) [33]  | cancer pain                               | 12-18 years, both male and female, literacy level not mentioned                  | sensory, effective and evaluative nature of pain as well as questions related to pain management strategies and their effectiveness                                                                                                                             | smartphone – iPhone; Apple iOS; Internet Technology, Mobile Computing, Computer Graphics (Gamification)          | active | 2 times a day each morning and evening. If an adolescent experiences | 1. visual analogue slider (dimensions of pain)<br>2. pain drawing (location)<br>3. MCQs (duration of pain, causes of pain, | static & standard  |  |

pain anytime between these scheduled assessments, a truncated 8-item pain questionnaire can be completed to minimize the response burden for adolescents

pain management strategies used and their effectiveness.)

4. List of options to select from

5. free-text question as additional information

**Table S2.** Summary of Study Characteristics–Pain Management Mobile Applications aspects of usability and some additional data.

| Author & Year                                                                                                       | Is Usability Evaluation Done by Real Users or By Experts? (Duration and Number of Persons Involved)                                | Empirical Methods to Evaluate Usability                                    | Which Usability Features Are More Targeted in the Studies?                                                                                  | Help Feature  | Review Feature                        | System Design - User Centered? | Clinical Expertise Involved? |
|---------------------------------------------------------------------------------------------------------------------|------------------------------------------------------------------------------------------------------------------------------------|----------------------------------------------------------------------------|---------------------------------------------------------------------------------------------------------------------------------------------|---------------|---------------------------------------|--------------------------------|------------------------------|
| Serif, T., & Ghinea, G. (2005) [38]                                                                                 | 3 real time users, 5 days - first iteration<br>after modifications second iteration<br>50 patients, 5 days<br>4 clinicians, 7 days | questionnaire – patients;<br>open ended questionnaire - clinicians         | clarity of content, font size, color scheme, navigation                                                                                     | no            | no                                    | yes                            | yes                          |
| Stinson, J. N., Petroz, G. C., Tait, G., Feldman, B. M., Streiner, D., McGrath, P. J., & Stevens, B. J. (2006) [44] | 2 cycles - 10 patients each,                                                                                                       | think aloud open-ended interview questions                                 | learnability, ease of use, ease to understand, completion time, satisfaction, error                                                         | no            | "semi                                 | yes                            | no                           |
| Kearney, N., Kidd, L., Miller, M., Sage, M., Khorrami, J., McGee, M., ... & Gray, P. (2006) [58]                    | 18 patients, 9 health professionals                                                                                                | pre and post evaluation questionnaire, interview, software log of activity | Patients: Perceived ease of use, usefulness, Knowledge and confidence, Self-care behavior and symptom management, Communication and support | not mentioned | can undo a response before proceeding | yes                            | yes                          |

|                                                                                                           |                                                                                                                                                                                                                                                                                                                                                               |                                              |                                                                                                                                                                                                                 |     |  |                                                       |                                                                                                        |    |
|-----------------------------------------------------------------------------------------------------------|---------------------------------------------------------------------------------------------------------------------------------------------------------------------------------------------------------------------------------------------------------------------------------------------------------------------------------------------------------------|----------------------------------------------|-----------------------------------------------------------------------------------------------------------------------------------------------------------------------------------------------------------------|-----|--|-------------------------------------------------------|--------------------------------------------------------------------------------------------------------|----|
|                                                                                                           |                                                                                                                                                                                                                                                                                                                                                               |                                              | Health Professional:<br>Understanding<br>symptom experiences,<br>Monitoring and<br>managing symptoms,<br>Communication and<br>support, workload<br>demand<br>feedback between<br>patients and project<br>nurse  |     |  |                                                       |                                                                                                        |    |
| Sorbi, M. J., Mak, S. B., Houtveen, J. H., Kleiboer, A. M., & van Doornen, L. J. (2007) [40]              | usability testing with real time users<br>5 women, 8.5 days (2 phase testing)<br>The first test run with three participants tested 4-5 diary prompts per day. The second run with another three participants (including one subject who participated in both runs) tested a reduced prompting scheme (2-3 prompts per day) and minor adaptations to the diary | Evaluative<br>Questionnaire<br>and Interview | User-friendliness of the PDA, Immediate compliance with online monitoring, Impact of ODA, ODA support of behavioral training key targets                                                                        | no  |  | but can not reverse back to review previous response" | no                                                                                                     | No |
| Anatchkova, M. D., Saris-Baglama, R. N., Kosinski, M., & Bjorner, J. B. (2009) [23]                       | Half of the participants (n = 50) evaluated the dynamic form and the other half (n = 50) evaluated the static form.<br>A 4 months feasibility study followed by questionnaire evaluation                                                                                                                                                                      | questionnaire                                | helpfulness of the tool in understanding the impact of pain, relevance of the items, difficulty of completing the assessment, and willingness to complete the survey again                                      | no  |  | not mentioned                                         | No<br>Users were asked to evaluate the system for feedback and changes will be made in future research | no |
| McClellan, C. B., Schatz, J. C., Puffer, E., Sanchez, C. E., Stancil, M. T., & Roberts, C. W. (2009) [34] | 19 participants, 8 weeks intervention<br>patient and care taker (parents)                                                                                                                                                                                                                                                                                     | questionnaire                                | protocol attractiveness, consumer satisfaction: level of difficulty in using the protocol, perceptions of efficacy of the pain management strategies, satisfaction with the protocol, and whether the parent or | yes |  | no                                                    | no                                                                                                     | no |

|                                                                                                                |                                                                                                                                                                |                                                                          |                                                                                                                                                                                                                                                                   |    |                 |     |                                                                                                                                        |
|----------------------------------------------------------------------------------------------------------------|----------------------------------------------------------------------------------------------------------------------------------------------------------------|--------------------------------------------------------------------------|-------------------------------------------------------------------------------------------------------------------------------------------------------------------------------------------------------------------------------------------------------------------|----|-----------------|-----|----------------------------------------------------------------------------------------------------------------------------------------|
|                                                                                                                |                                                                                                                                                                |                                                                          | child would recommend the protocol to others                                                                                                                                                                                                                      |    |                 |     |                                                                                                                                        |
| Luckmann, R., & Vidal, A. (2010) [24]                                                                          | usability testing with 4 users and 1 hour each on the basis of formal protocols and scenarios that were videotaped                                             | reviewed the video tapes, took notes on user behaviors and dialogue that | comprehensiveness of the queries, response set and interface                                                                                                                                                                                                      | no | no (as dynamic) | yes | no                                                                                                                                     |
| Hachizuka, M., Yoshiuchi, K., Yamamoto, Y., Iwase, S., Nakagawa, K., Kawagoe, K., & Akabayashi, A. (2010) [26] | 15 patients recorded pain details for 7 days                                                                                                                   | interview                                                                | user-friendliness of the device and simplicity of the content                                                                                                                                                                                                     | no | yes             | yes | no                                                                                                                                     |
| Rosser, B. A., McCullagh, P., Davies, R., Mountain, G. A., McCracken, L., & Eccleston, C. (2011) [15]          |                                                                                                                                                                |                                                                          | Ease of use                                                                                                                                                                                                                                                       | no | yes             | yes | yes                                                                                                                                    |
| Jacob, E., Stinson, J., Duran, J., Gupta, A., Gerla, M., Lewis, M. A., & Zeltzer, L. (2012) [35]               | 1 patient - initial pre-test<br>3 patients - second pre-test<br>10 patients - pilot study 1, one hour session<br>21 patients - pilot study 2, one hour session | not mentioned                                                            | ease of use, accuracy, efficiency, responsiveness of the screens to touch, navigation, functionalities (submit, clear, cursor movement), visual appearance and layout, error prevention, clarification of the wording of questions, readability, user-interaction | no | no              | yes | No it is based on the measures of pain and symptoms found from literature specifically for children suffering from sickle cell disease |
| Spyridonis, F., Grønli, T. M., Hansen, J., & Ghinea, G. (2012)                                                 | 7 real users, usability test 15-18mins                                                                                                                         | questionnaire                                                            | ease of use, complexity, learnability, inconsistency, self-efficacy, clarity, error                                                                                                                                                                               | no | no              | no  | yes                                                                                                                                    |

|                                                                                                                            |                                                                                                                                                        |                                                                   |                                                                                                       |                        |    |                                       |     |
|----------------------------------------------------------------------------------------------------------------------------|--------------------------------------------------------------------------------------------------------------------------------------------------------|-------------------------------------------------------------------|-------------------------------------------------------------------------------------------------------|------------------------|----|---------------------------------------|-----|
| [46]                                                                                                                       |                                                                                                                                                        |                                                                   | prevention, attractiveness.                                                                           |                        |    |                                       |     |
| Baggott, C., Gibson, F., Coll, B., Kletter, R., Zeltzer, P., & Miaskowski, C. (2012) [27]                                  | 10 patients, 3 weeks trial                                                                                                                             | questionnaire, think-aloud and interview                          | usefulness                                                                                            | yes                    | no | no                                    | yes |
| Stinson, J. N., Jibb, L. A., Nguyen, C., Nathan, P. C., Maloney, A. M., Dupuis, L. L., ... & Portwine, C. (2013) [28]      | 15, Phase 1a: Low-Fidelity usability testing<br>18, Phase 1b: High-Fidelity usability and Content Validity Testing<br>14, Clinical feasibility testing | qualitative semi-structured, audio-taped interviews questionnaire | understandability, esthetics, ease of use, content validity, satisfaction                             | no                     | no | yes                                   | yes |
| Nes, A. A., Eide, H., Kristjánsdóttir, Ó. B., & van Dulmen, S. (2013) [42]                                                 | real time users, 4 weeks                                                                                                                               | questionnaire, interview                                          | ease of use                                                                                           | no                     | no | no                                    | no  |
| Garcia-Palacios, A., Herrero, R., Belmonte, M. A., Castilla, D., Guixeres, J., Molinari, G., ... & Botella, C. (2014) [43] | real time users, 47, 1 week                                                                                                                            | questionnaire (acceptability, preferences, technological profile) | accuracy, completeness ease of use, usefulness, efficiency                                            | yes audio instructions | no | no                                    | no  |
| Pombo, N., Araújo, P., Viana, J., & da Costa, M. D. (2014) [21]                                                            | real time users, 32, 5 days                                                                                                                            | questionnaire                                                     | acceptability, patient satisfaction, patient compliance stability, scalability, reliability of system | no                     | no | no                                    | no  |
| Jibb, L. A., Stevens, B. J., Nathan, P. C., Seto, E., Cafazzo, J. A., & Stinson, J. N.                                     | healthcare professional, adolescents                                                                                                                   | audio-recorded interviews                                         | usefulness, likability and effectiveness                                                              | no                     | no | yes phased and user-centered approach | yes |

|                                                                                                                      |                                                                                              |                          |                                                                 |               |    |                                                         |                                                         |  |
|----------------------------------------------------------------------------------------------------------------------|----------------------------------------------------------------------------------------------|--------------------------|-----------------------------------------------------------------|---------------|----|---------------------------------------------------------|---------------------------------------------------------|--|
| (2014) [29]                                                                                                          |                                                                                              |                          |                                                                 |               |    |                                                         |                                                         |  |
| Blödt, S., Pach, D., Roll, S., & Witt, C. M. (2014) [39]                                                             |                                                                                              |                          | ease of use                                                     | yes           | no | yes stakeholders were involved in requirement gathering | yes App concept was approved by data protection officer |  |
| Maguire, R., Ream, E., Richardson, A., Connaghan, J., Johnston, B., Kotronoulas, G., ... & Webster, L. (2015) [30]   | 16 patients, 13 healthcare professionals, 7 days during treatment and 1 month post treatment | interview, questionnaire | ease of use, self-efficacy                                      | no            | no | no                                                      | yes                                                     |  |
| Jonassaint, C. R., Shah, N., Jonassaint, J., & De Castro, L. (2015) [57]                                             | 15 patients used app for 28 days                                                             | email, interview         | usefulness, ease of use                                         | no            | no | no                                                      | yes                                                     |  |
| Huguet, A., McGrath, P. J., Wheaton, M., Mackinnon, S. P., Rozario, S., Tougas, M. E., ... & MacLean, C. (2015) [55] | 14 days<br>11-19 unique participants<br>three cycles of usability testing                    | questionnaire, interview | Efficiency, Acceptability, Learnability                         | yes tutorials | no | iterative participatory design                          | yes                                                     |  |
| Nguyen, A. M., Humphrey, L., Kitchen, H., Rehman, T., & Norquist, J. M. (2015) [56]                                  | 24 dysmenorrhea patients pilot-tested the eDiary for 1–5 weeks                               | think-aloud, interviews  | content validity, comprehensive and easy to complete/understand | yes           | no | yes                                                     | yes                                                     |  |

|                                                                                                                 |                                                                                                                                                                                        |                                                                                                        |                                                                                                                                                                                                                                                                                              |                                                                                                                             |               |                                |     |
|-----------------------------------------------------------------------------------------------------------------|----------------------------------------------------------------------------------------------------------------------------------------------------------------------------------------|--------------------------------------------------------------------------------------------------------|----------------------------------------------------------------------------------------------------------------------------------------------------------------------------------------------------------------------------------------------------------------------------------------------|-----------------------------------------------------------------------------------------------------------------------------|---------------|--------------------------------|-----|
| Bakshi, N., Stinson, J. N., Ross, D., Lukombo, I., Mittal, N., Joshi, S. V., ... & Krishnamurti, L. (2015) [37] | <p>Identification of Items: Two iterative cycles of expert review were conducted with 15 experts in the first cycle and 12 experts in the second cycle.</p> <p>Testing: 7 patients</p> | observation and field notes, semi-structured interview                                                 | <p>language, content, and relevance, understanding, paraphrasing, comprehension (meaning and understanding of the question), memory retrieval (ability to accurately recall the answer), relevance of the question, and Specific probes related to SCD (specificity of the item to SCD).</p> | yes                                                                                                                         | yes           | iterative participatory design | yes |
| Hochstenbach, L. M., Zwakhalen, S. M., Courtens, A. M., van Kleef, M., & de Witte, L. P. (2016) [32]            | real time users as well as experts<br>30-60mins interview with patients<br>90mins focus group discussion with nurses                                                                   | Questionnaire<br>Semi-structure interview<br>Focus Group discussion                                    | ease of use, understandability, navigation and interaction                                                                                                                                                                                                                                   | not mentioned                                                                                                               | yes           | yes                            | yes |
| Fortier, M. A., Chung, W. W., Martinez, A., Gago-Masague, S., & Sender, L. (2016) [31]                          | real time users                                                                                                                                                                        | Questionnaire                                                                                          | usefulness, satisfaction, attractiveness                                                                                                                                                                                                                                                     | tutorials only for behavioral skill training<br>A three-dimensional(3-D)avatar that guides the child throughout the program | yes           | iterative participatory design | yes |
| Ingadottir, B., Blondal, K., Thue, D., Zoega, S., Thylen, I., & Jaarsma, T. (2017) [22]                         | real users (n = 20)                                                                                                                                                                    | Questionnaires, direct observation by a nonparticipant observer, and short semi structured interviews. | Ease of Use and Usefulness                                                                                                                                                                                                                                                                   | no                                                                                                                          | not mentioned | iterative participatory design | yes |

|                                                                                                                |                                              |                                                              |                                                                       |    |    |                                                      |     |
|----------------------------------------------------------------------------------------------------------------|----------------------------------------------|--------------------------------------------------------------|-----------------------------------------------------------------------|----|----|------------------------------------------------------|-----|
| Jibb, L. A., Cafazzo, J. A., Nathan, P. C., Seto, E., Stevens, B. J., Nguyen, C., & Stinson, J. N. (2017) [33] | real time users (n = 16)<br>3 testing cycles | Observation,<br>Think-aloud,<br>Semi structured<br>interview | ease of use,<br>understandability,<br>efficiency and<br>acceptability | no | no | user-centered<br>and iterative<br>design<br>approach | yes |
|----------------------------------------------------------------------------------------------------------------|----------------------------------------------|--------------------------------------------------------------|-----------------------------------------------------------------------|----|----|------------------------------------------------------|-----|
