# Supplementary material
Source: MDPI journal article supplement (https://www.mdpi.com/2073-8994/11/3/400)
Supplement: s1 [file s1]

Archive with 2 entries (2 files):
- symmetry-421388-S1.pdf
- symmetry-421388-S2.pdf
